# Supplementary material for: Nanoporous manganese ferrite films by anodising electroplated Fe–Mn alloys for bifunctional oxygen electrodes
Source: Royal Society of Chemistry journal article supplement (doi:10.1039/d1nr02457d), 2021-01-01
Supplement: d1nr02457d1.pdf [file d1nr02457d1.pdf]

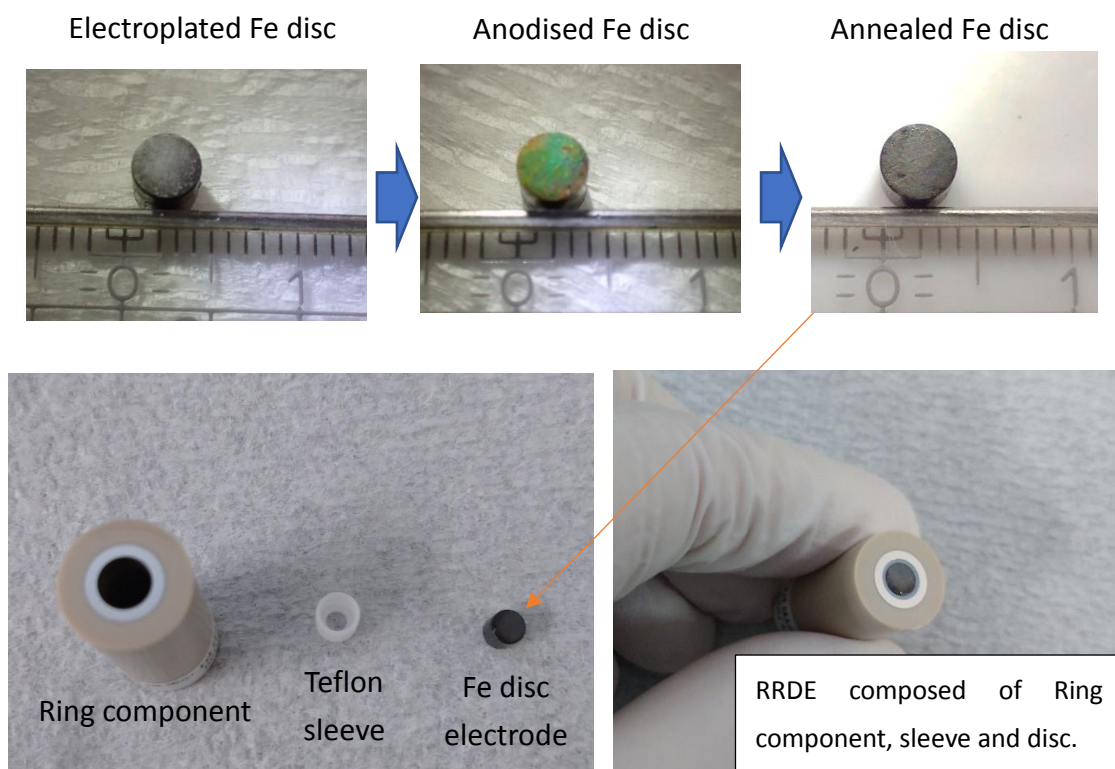

Fig. S1 Photos of Fe discs and components of RRDE. Fe disc in the Teflon sleeve were inserted into the Ring component.

Table S1 Bath composition for electroplating of Fe–Mn alloy films.

| Bath Composition                      | mol dm <sup>-3</sup> |
|---------------------------------------|----------------------|
| FeCl <sub>2</sub> · 4H <sub>2</sub> O | 0.05                 |
| MnCl <sub>2</sub> · 4H <sub>2</sub> O | 0.5                  |
| NH <sub>4</sub> Cl                    | 1.0                  |
| Trisodium Citrate · 2H <sub>2</sub> O | 0.1                  |

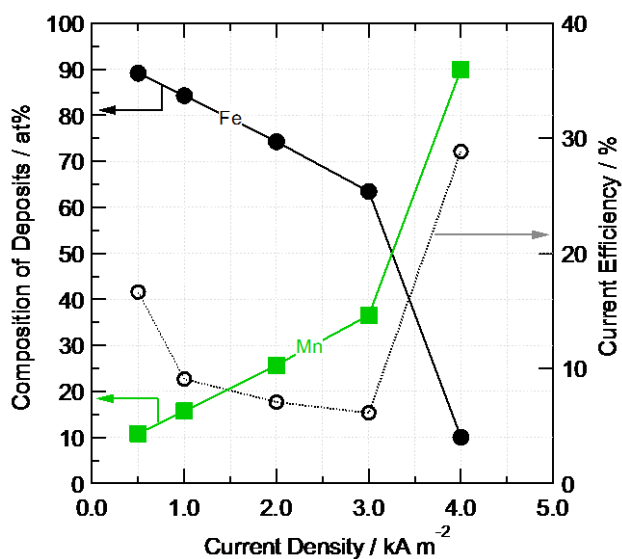

Fig. S2 Effect of current density during electroplating on composition of Fe–Mn deposits and current efficiency.

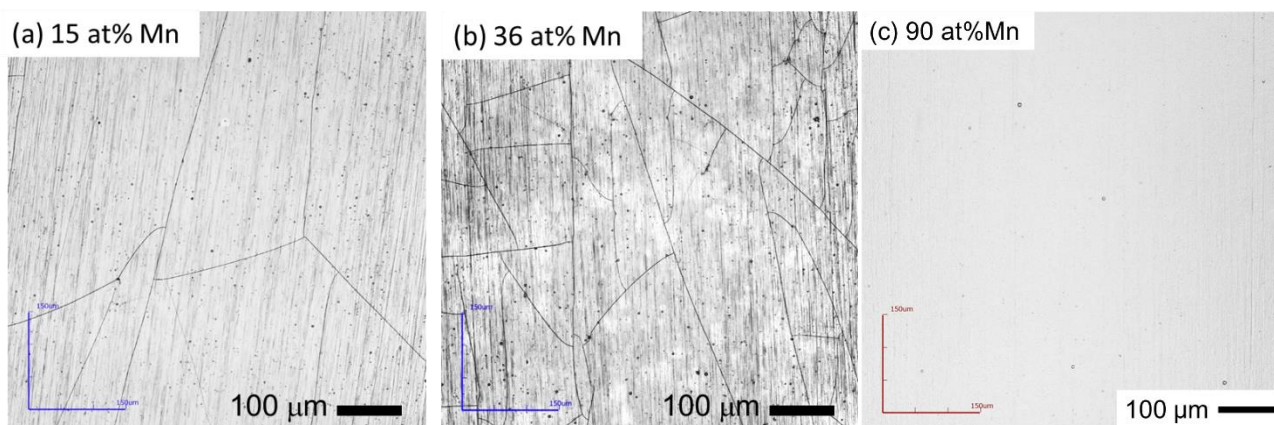

Fig. S3 Laser microscope images of Fe–Mn films with Mn contents of (a) 15 at%, (b) 36 at%, and (c) 90 at%.

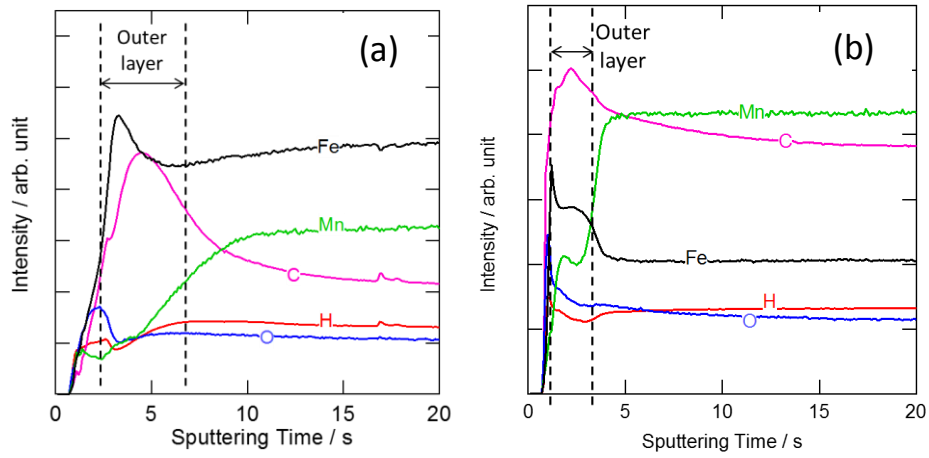

Fig. S4 Elemental GD-OES depth profiles of Fe–Mn film surfaces before anodising: (a) Fe–15 at% Mn, (b) Fe–36 at% Mn.

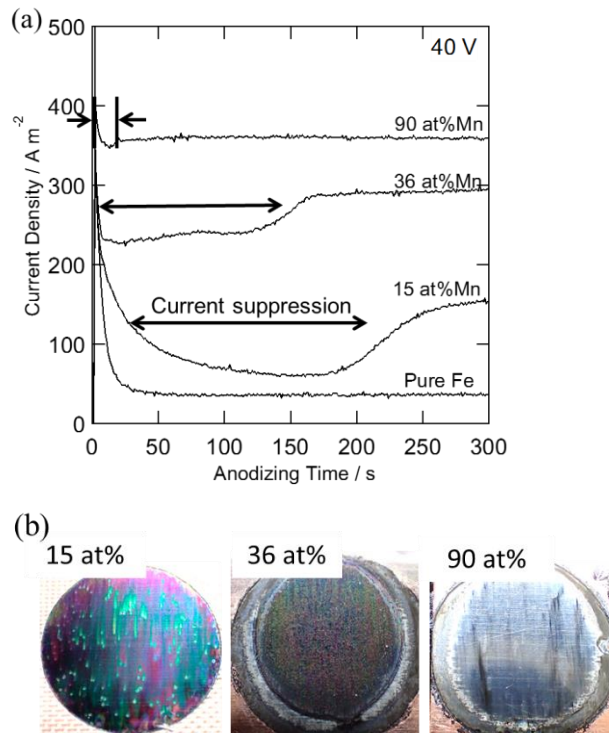

Fig. S5 (a) Current density–time curves recorded during anodising and (b) photographs of Fe–Mn specimens after anodising.

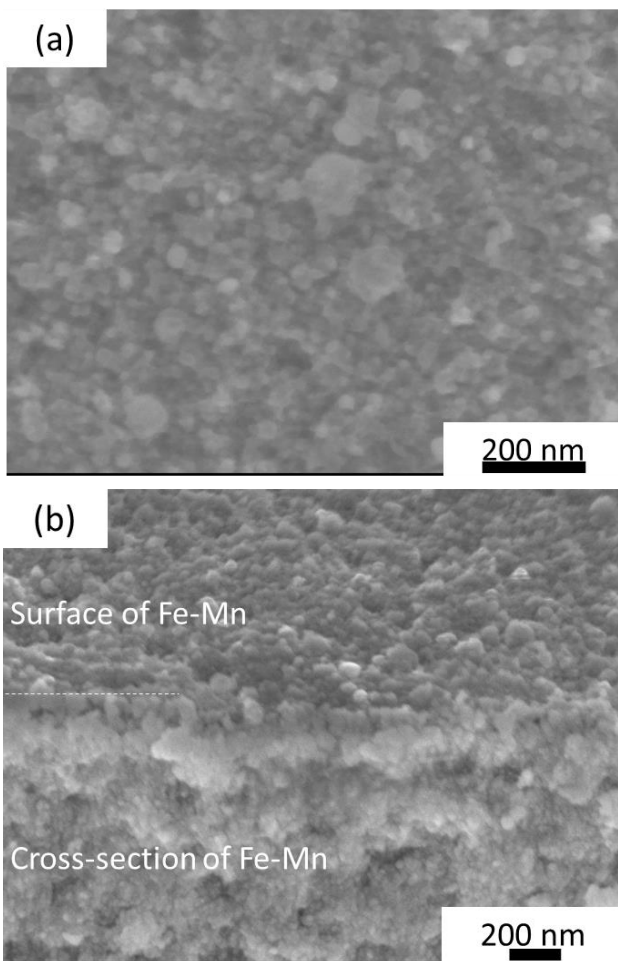

Fig. S6 (a) Surface and (b) fractured cross-sectional scanning electron images of Fe-90 at% Mn electrodeposited film.

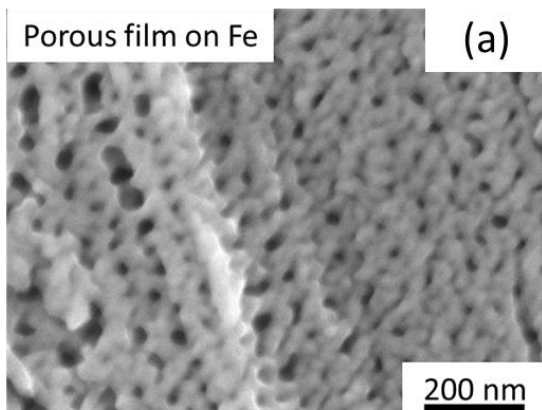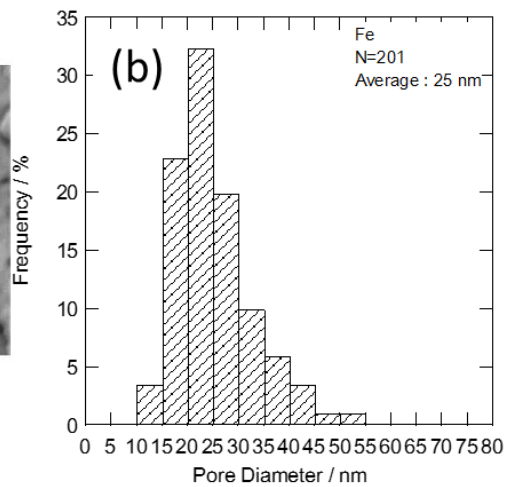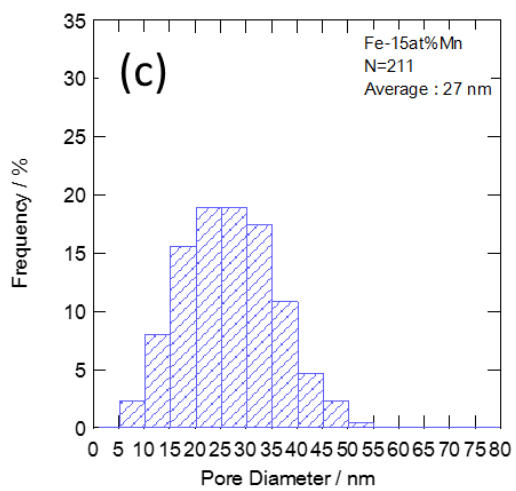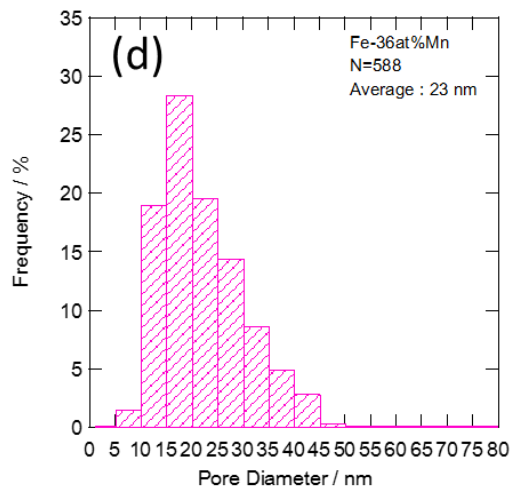

Fig. S7 (a) Electron microscope image of the surface of porous oxide on Fe, (b)-(d) Pore diameter distribution on Fe and Fe-Mn.

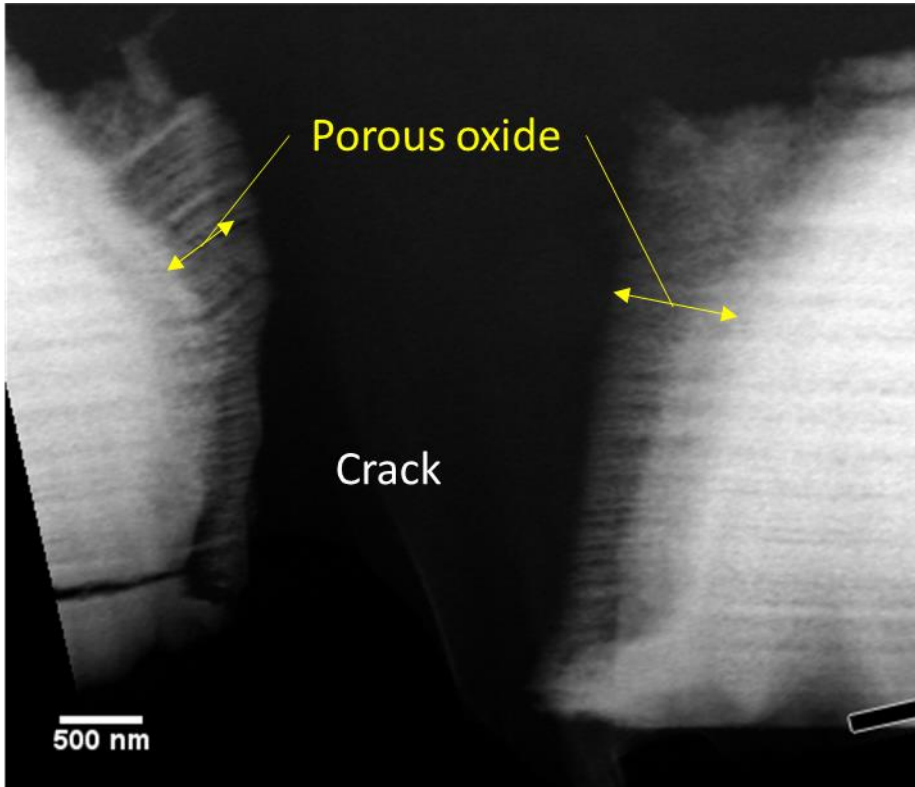

Fig. S8 Cross-sectional dark field TEM image of porous oxide on Fe-36 at% Mn deposited film.

Table S2 Electron transfer number,  $n$  and kinetic current,  $i_k$  estimated from RRDE and K-L analysis at 0.05 V for ORR.

| Sample     | $n$ ( estimated from RRDE) | $n$ ( estimated from K-L) | $i_k$ / mA |
|------------|----------------------------|---------------------------|------------|
| Fe         | 3.78                       | 3.38                      | 4.90       |
| Fe-15at%Mn | 3.96                       | 3.87                      | 43.2       |
| Fe-36at%Mn | 3.93                       | 4.47                      | 3.85       |

Table S3 Comparison of the electrocatalyst based on manganese ferrite from the literature in 0.1 mol dm<sup>-3</sup> KOH for ORR.

| No. | Sample                                                                       | $E_{\text{onset}}^a$ / V vs. | $E_{1/2}^b$ / V vs. | Reference |
|-----|------------------------------------------------------------------------------|------------------------------|---------------------|-----------|
|     |                                                                              | RHE                          | RHE                 |           |
| 1   | MnFe <sub>2</sub> O <sub>4</sub> nanoparticles mixed with C                  | 0.88                         | 0.80                | S1        |
| 2   | MnFe <sub>2</sub> O <sub>4</sub> mixed with XC-72                            | 0.88                         | 0.76                | S2        |
| 3   | Mn-Fe oxide nanopetal on carbonpaper                                         | 0.95                         |                     | S3        |
| 4   | Al-substituted MnFe <sub>2</sub> O <sub>4</sub> /rGO                         | 0.92                         |                     | S4        |
| 5   | Ag-MnFe <sub>2</sub> O <sub>4</sub> /N, S-codoped graphene                   | 0.908                        | 0.824               | S5        |
| 6   | MnFe <sub>2</sub> O <sub>4</sub> colloidal nanocrystal assemblies            |                              | 0.586               | S6        |
| 7   | Mn <sub>0.5</sub> Fe <sub>2.5</sub> O <sub>4</sub> NP/MC film (Fe-15 at% Mn) | 0.88                         | 0.56                | This work |
| 8   | MnFe <sub>2</sub> O <sub>4</sub> NP/MC film (Fe-36 at% Mn)                   | 0.88                         | 0.51                | This work |

<sup>a</sup> Onset potential. <sup>b</sup> half-wave potential.

Table S4 Comparison of the electrocatalyst based on manganese ferrite from the literature in 0.1 mol dm<sup>-3</sup> KOH for OER.

| No. | Sample                                                                       | $E_5^a$ / V vs. RHE | $E_{10}^b$ / V vs. RHE | Tafel slope / mV dec <sup>-1</sup> | Reference |
|-----|------------------------------------------------------------------------------|---------------------|------------------------|------------------------------------|-----------|
| 1   | MnFe <sub>2</sub> O <sub>4</sub> mixed with XC-72                            |                     | 1.82                   |                                    | S2        |
| 2   | Mn-Fe oxide nanopetal on carbonpaper                                         |                     | 1.96                   | 80                                 | S3        |
| 3   | MnFe <sub>2</sub> O <sub>4</sub> Nanoparticle                                | 1.87                |                        | 249.16                             | S7        |
| 4   | MnFe <sub>2</sub> O <sub>4</sub> Nanofiber                                   | 1.75                |                        | 113.62                             | S7        |
| 5   | Ag- MnFe <sub>2</sub> O <sub>4</sub> /N, S-codoped graphene                  |                     | 1.75                   |                                    | S5        |
| 6   | Mn <sub>0.5</sub> Fe <sub>2.5</sub> O <sub>4</sub> NP/MC film (Fe-15 at% Mn) | 1.75                | 1.79                   | 129                                | This work |
| 7   | MnFe <sub>2</sub> O <sub>4</sub> NP/MC film (Fe-36 at% Mn)                   | 1.72                | 1.74                   | 88                                 | This work |

<sup>a</sup> Potential at 5 mA cm<sup>-2</sup>. <sup>b</sup> Potential at 10 mA cm<sup>-2</sup>.

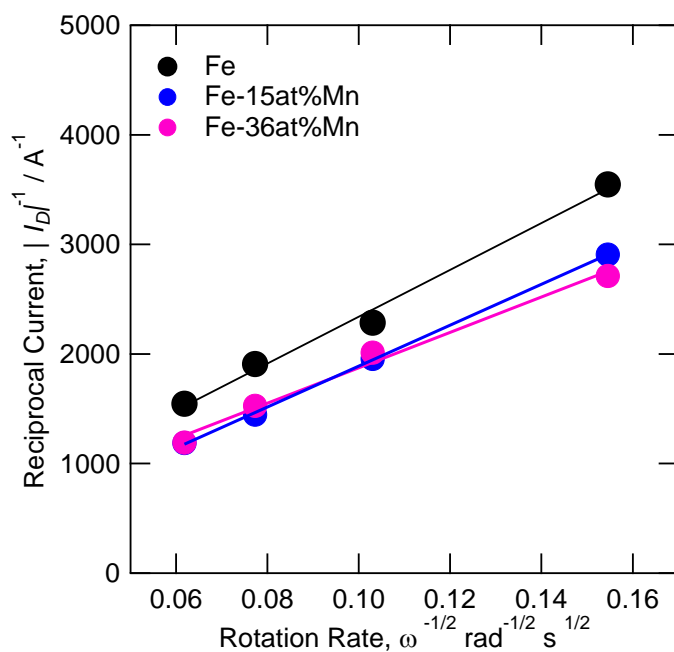

Fig. S9 Koutecky–Levich plots of the porous oxides from the values of measured current at 0.05 V vs. RHE.



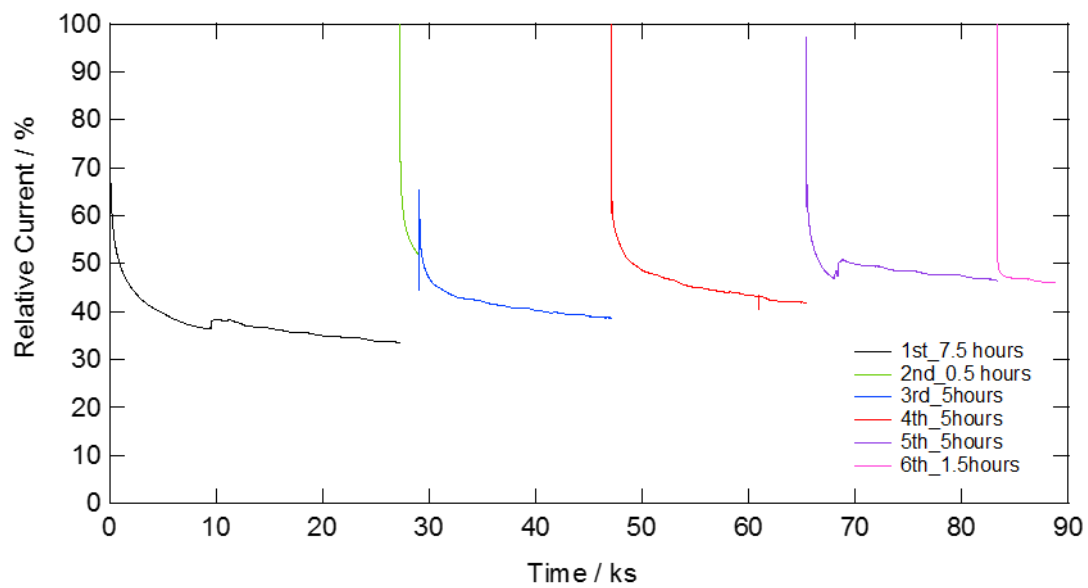

Fig. S10 Relative current of the porous oxide on Fe-15 at% Mn during ORR durability test at a potential of 0.6 V vs. RHE. The durability test was carried out several times for a total of 24 hours.

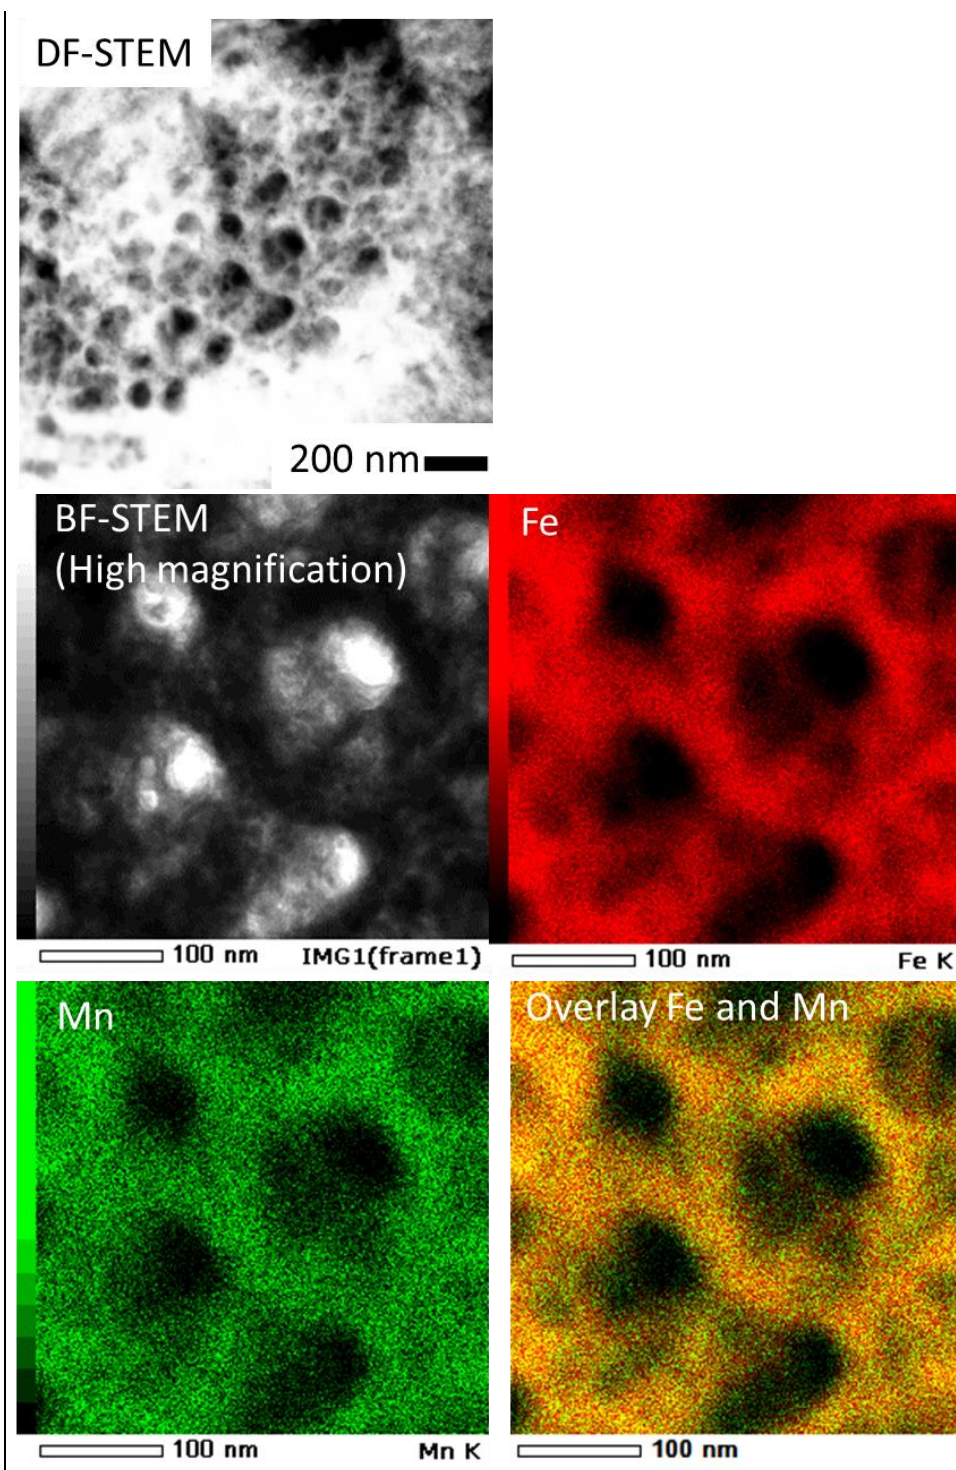

Fig. S11 Dark-field STEM image, Bright-field STEM image and EDX maps on the fragment of porous oxide on Fe-15 at% Mn after ORR durability test for total of 24 h. The oxide fragment was obtained by scratching the electrode.

Table S5 Composition of the porous oxide on Fe-15 at % Mn after ORR durability test for total of 24 h

| Element           | O    | K   | Mn  | Fe   |
|-------------------|------|-----|-----|------|
| Composition / at% | 57.6 | 3.3 | 3.5 | 35.5 |

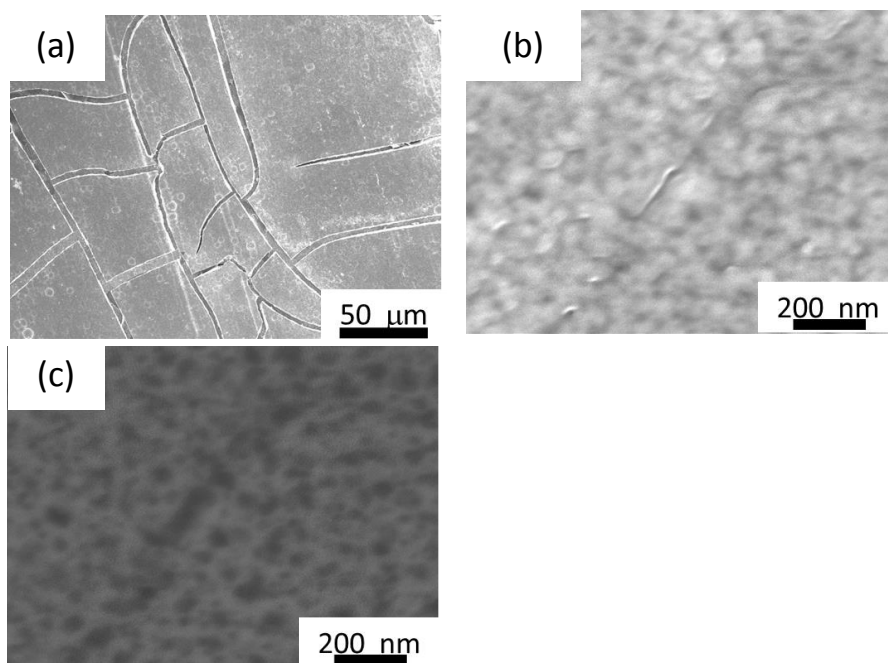

Fig. S12 Electron microscope images of the porous oxide on Fe-15 at% Mn after ORR durability test for a total of 24 h; (a) and (b) the surface images by secondary electron (c) Electron microscope images by back-scattered electrons.

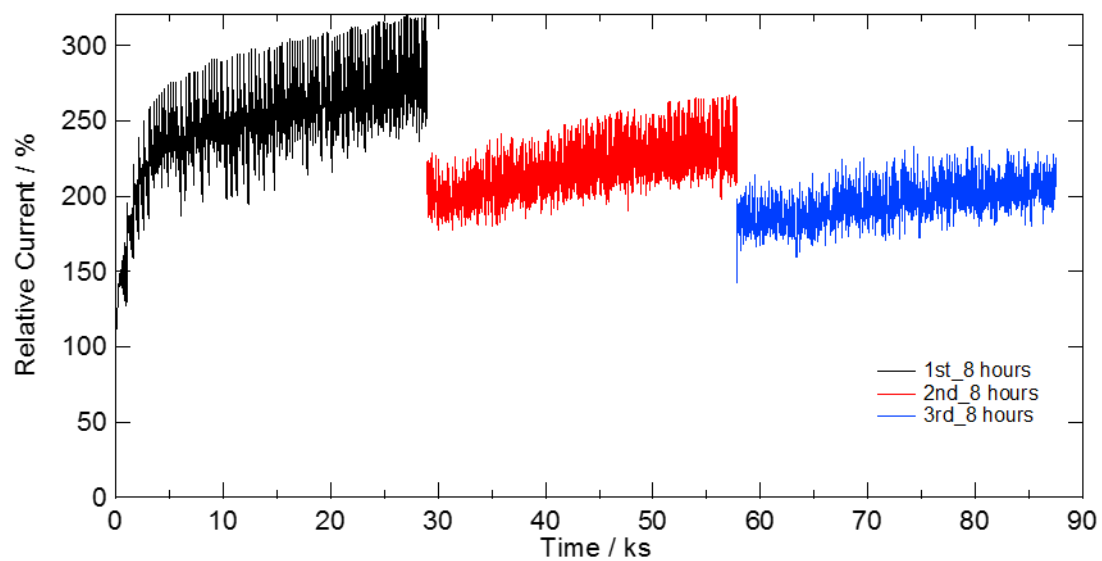

Fig. S13 Relative current of the porous oxide on Fe-15 at% Mn during OER durability test at a potential of 1.8 V vs. RHE. The durability test was carried out 3 times over 8 hour, for a total of 24 hours.

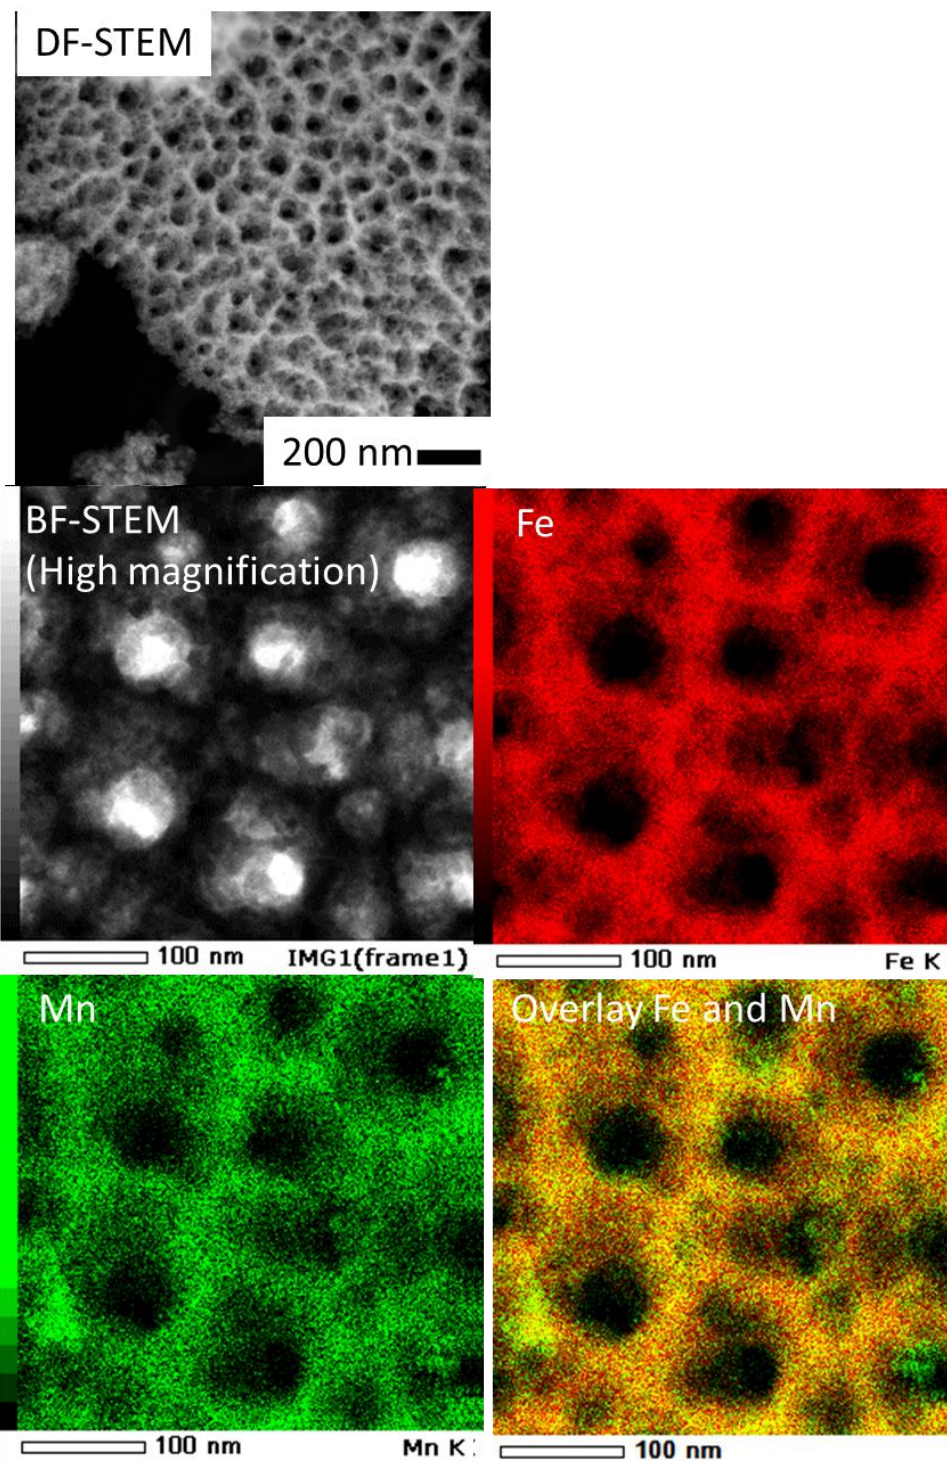

Fig. S14 Dark-field STEM image, Bright-field STEM image and EDX maps on the fragment of porous oxide on Fe-15 at% Mn after OER durability test for a total of 24 h. The oxide fragment was obtained by scratching the electrode.

Table S6 Composition of the porous oxide on Fe-15 at %Mn after OER durability test for total of 24 h

| Element           | O    | K   | Mn  | Fe   |
|-------------------|------|-----|-----|------|
| Composition / at% | 66.3 | 0.2 | 3.5 | 29.9 |

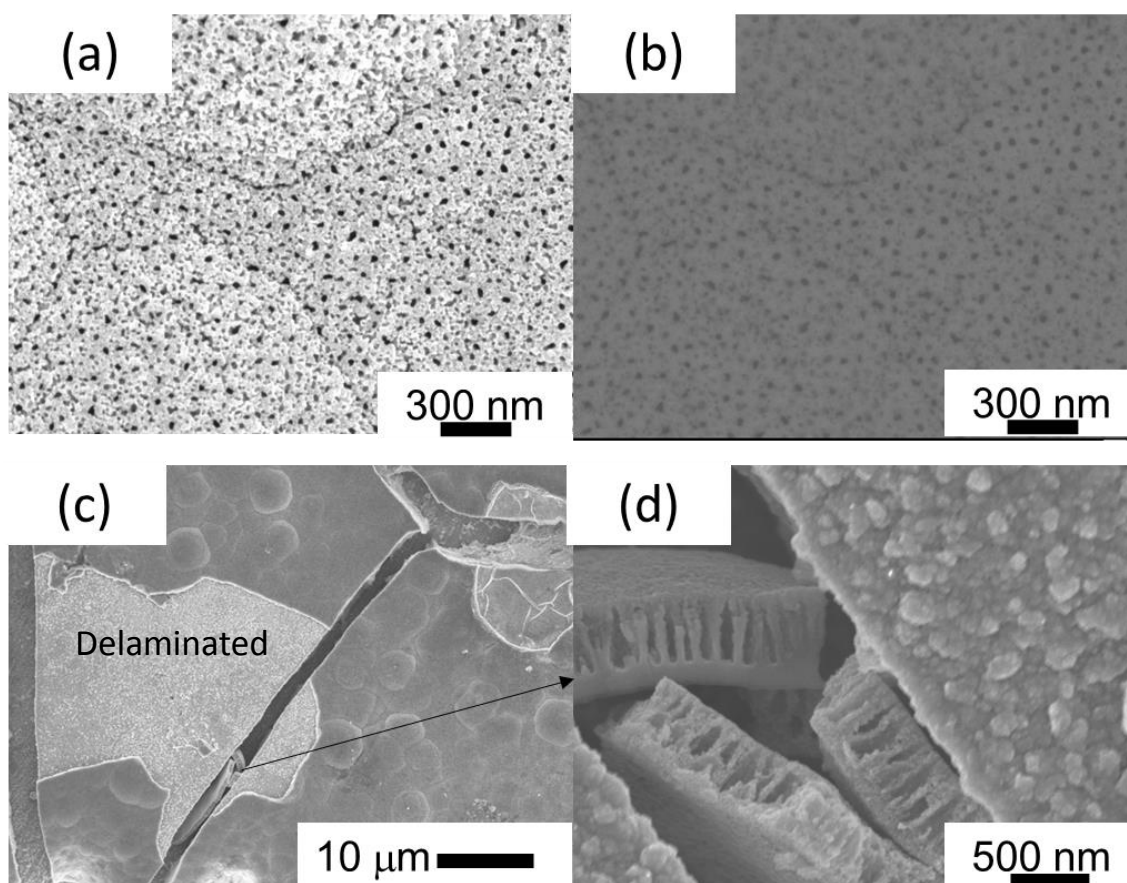

Fig. S15 Electron microscope images of the porous oxide on Fe-15 at% Mn after OER durability test for a total of 24 h; (a), (c) and (d) the surface images by secondary electron (b) Electron microscope images by back-scattered electrons at the same part of (a).

## Reference

- S1) H. Zhu, S. Zhang, Y.-X. Huang, L. Wu and S. Sun, *Nano Lett.*, 2013, **13**, 2947.
- S2) C. Si, Y. Zhang, C. Zhang, H. Gao, W. Ma, L. Lv, Z. Zhang, *Electrochim. Acta*, 2017, **245**, 829.
- S3) N.Bhandary, P. P. Ingole and S. Basu, *Int. J. Hydrog. Energy*, 2018, **43**, 3165.
- S4) A. Tyagi, Y. K. Penke, P. Sinha, I. Malik, K. K. Kar, J. Ramkumar, H. Yokoi, *Int. J. Hydrog. Energy*, 2021, **46**, 22434.
- S5) Y. Chen, Z. Shi, S. Li, J. Feng, B. Pang, L. Yua, W. Zhang, L. Dong, *J. Electroanal. Chem.*, 2020, **860**, 113930.
- S6) Zhen Li, Kai Gao, Guangting Han, Rongyue Wang, Hongliang Li, X. S. Zhaoabc and Peizhi Guo, *New J. Chem.*, 2015, **9**, 361
- S7) M. Li, Y. Xiong, X. Liu, X. Bo, Y. Zhang, C. Hana and L. Guo, *Nanoscale*, 2015, **7**, 8920.
